# Supplementary material for: Novel mouse model of encephalocele: post-neurulation origin and relationship to open neural tube defects
Source: PubMed Central journal article supplement (PMC6899037; doi:10.1242/dmm.040683), 2019-11-14
Supplement: dmm-12-040683-s1.pdf [file dmm-12-040683-s1.pdf]

## Supplementary data set

[Click here to Download Data S1](#)
